# Supplementary material
Source: publisher site journal article supplement (https://www.dovepress.com/get_supplementary_file.php?f=344146.docx)
Supplement: Supplementary file 1 [file get_supplementary_file.php]

**Table S1. The associations between DST and CXL12/KDR in three GEO datasets**

| **dataset** | **gene** | **correlation** | **P value** |
| --- | --- | --- | --- |
| **GSE22358** | **CXCL12** | **0.534** | **4.94E-13** |
|  | **KDR** | **0.455** | **1.93E-09** |
| **GSE9014**  **GSE5764** | **CXCL12**  **KDR**  **CXCL12** | **0.187**  **0.260**  **-0.249** | **0.039**  **3.72E-3**  **0.184** |
|  | **KDR** | **-0.149** | **0.428** |
